1 Continuous, Topologically Guided Protein Crystallization Controls Bacterial Surface Layer Self-  
2 Assembly

3

4 Colin J. Comerci\*<sup>1,2</sup>, Jonathan Herrmann\*<sup>3,4</sup>, Joshua Yoon<sup>5,2</sup>, Fatemeh Jabbarpour<sup>3,4</sup>, Xiaofeng  
5 Zhou<sup>6</sup>, John F. Nomellini<sup>7</sup>, John Smit<sup>7</sup>, Lucy Shapiro<sup>6</sup>, Soichi Wakatsuki<sup>3,4</sup>, and W.E.  
6 Moerner<sup>1,2,5</sup>

7

8 <sup>1</sup>Biophysics Program, Stanford University, Stanford, CA, USA

9 <sup>2</sup>Department of Chemistry, Stanford University, Stanford, CA, USA

10 <sup>3</sup>Department of Structural Biology, Stanford University, Stanford, CA, USA

11 <sup>4</sup>Bioscience Division, SLAC National Accelerator Laboratory, Menlo Park, CA, USA

12 <sup>5</sup>Department of Applied Physics, Stanford University, Stanford, CA, USA

13 <sup>6</sup>Department of Developmental Biology, Stanford University, Stanford, CA, USA

14 <sup>7</sup>Department of Microbiology and Immunology, University of British Columbia, Vancouver, BC,  
15 CA

16

17 \*These authors contributed equally to this work.

18

19 Abstract

20 Bacteria assemble the cell envelope using localized enzymes to account for growth and  
21 division of a topologically complicated surface<sup>1-3</sup>. However, a regulatory pathway has not been  
22 identified for assembly and maintenance of the surface layer (S-layer), a 2D crystalline protein  
23 coat surrounding the curved 3D surface of a variety of bacteria<sup>4,5</sup>. By specifically labeling,

24 imaging, and tracking native and purified RsaA, the S-layer protein (SLP) from *C. crescentus*,  
25 we show that protein self-assembly alone is sufficient to assemble and maintain the S-layer *in*  
26 *vivo*. By monitoring the location of newly produced S-layer on the surface of living bacteria, we  
27 find that S-layer assembly occurs independently of the site of RsaA secretion and that localized  
28 production of new cell wall surface area alone is insufficient to explain S-layer assembly  
29 patterns. When the cell surface is devoid of a pre-existing S-layer, the location of S-layer  
30 assembly depends on the nucleation characteristics of SLP crystals, which grow by capturing  
31 RsaA molecules freely diffusing on the outer bacterial surface. Based on these observations, we  
32 propose a model of S-layer assembly whereby RsaA monomers are secreted randomly and  
33 diffuse on the lipopolysaccharide (LPS) outer membrane until incorporated into growing 2D S-  
34 layer crystals. The complicated topology of the cell surface enables formation of defects, gaps,  
35 and grain boundaries within the S-layer lattice, thereby guiding the location of S-layer assembly  
36 without enzymatic assistance. This unsupervised mechanism poses unique challenges and  
37 advantages for designing treatments targeting cell surface structures or utilizing S-layers as self-  
38 assembling macromolecular nanomaterials. As an evolutionary driver, 2D protein self-assembly  
39 rationalizes the exceptional S-layer subunit sequence and species diversity<sup>6</sup>.

40

41 Main Text

42 Assembling a macromolecular structure on the micron scale often requires input energy  
43 and spatial coordination by enzymes and other cellular processes<sup>1-3</sup>. S-layers, however, exist  
44 outside the cell envelope and lack access to many cytosolic components, including ATP<sup>4-6</sup>. How  
45 do microbes continuously assemble a crystalline macromolecular structure on a highly curved  
46 cell surface undergoing drastic changes during normal cell growth? To answer this question, we

47 performed time-resolved, super-resolution fluorescence imaging and single-molecule tracking  
48 (SMT) of S-layer assembly on living *C. crescentus* cells. In *C. crescentus*, the S-layer is made of  
49 a single 98 kDa SLP, RsaA, which accounts for around 30% of the cell's total protein synthesis<sup>7</sup>.  
50 RsaA, like other SLPs, self-assembles into crystalline sheets upon the addition of divalent  
51 calcium ( $\text{Ca}^{2+}$ ) *in vitro*<sup>8-12</sup>. Given the many fitness-related functions ascribed to crystalline  
52 bacterial S-layers, we hypothesized that SLP self-assembly may play a role in generating the S-  
53 layer coat *in vivo*<sup>4,6</sup>.

54 RsaA covers the cellular surface of *C. crescentus* by forming a 22 nm-repeat hexameric  
55 crystal lattice and is non-covalently anchored to an ~18 nm thick LPS outer membrane<sup>13-17</sup>  
56 (Figure 1a,b). The surface topology of stalked and predivisional *C. crescentus* includes a  
57 cylindrical stalk measuring roughly 100 nm in diameter while the crescentoid cell body  
58 approaches 800 nm in width<sup>18,19</sup> (Figure 1d). This large variety of curved topologies guarantees  
59 that crystal distortion and defects within the S-layer lattice structure are present, defects which  
60 enable complete coverage of the bacterial surface<sup>4,13,20,21</sup>. We can use Gaussian curvature, the  
61 product of the maximum and minimum curvatures at a given point, to quantify the cellular  
62 topology<sup>22</sup>. Crystalline defects cluster at regions with high absolute values of Gaussian curvature  
63 such as the cell poles and division plane, while grain boundaries occur where Gaussian curvature  
64 approaches zero such as the cell body (Figure 1d)<sup>20,21</sup>.

65 Specifically labeling the S-layer *in vivo* has proven difficult due to the SLP's life cycle  
66 and functions, which include secretion, refolding, anchoring, and crystallization<sup>11,16,17,23,24</sup>.  
67 Previously, electron microscopy of the *C. crescentus* S-layer was performed by inserting cysteine  
68 residues into the RsaA sequence and labeling the protein with nanogold via maleimide  
69 chemistry<sup>13</sup>. One such variant, henceforth referred to as CysRsaA, consists of a small tail added

70

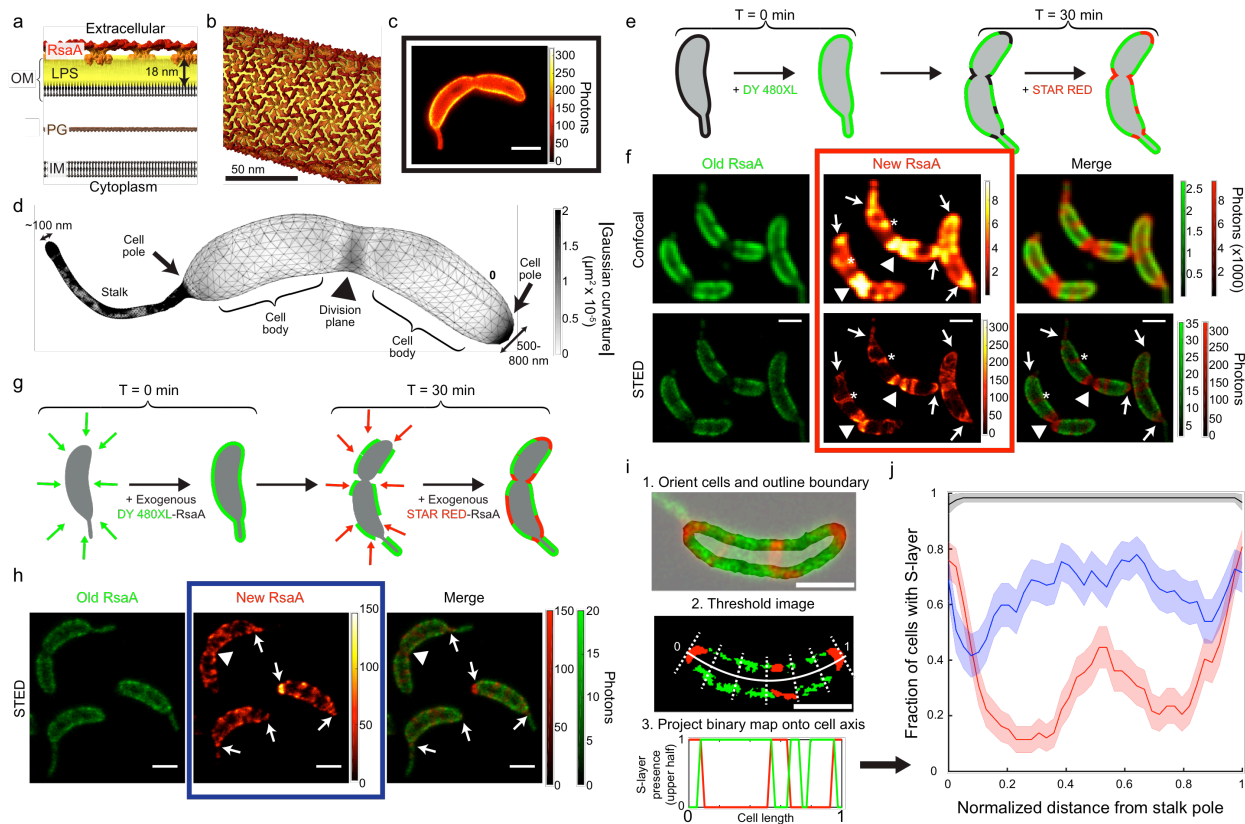

71

**Figure 1.** Localized S-layer assembly occurs primarily at the poles and division plane, independent of secretion. a) Schematic of the *C. crescentus* cell envelope with the S-layer crystal lattice (red/orange) anchored to the outer membrane (OM) via an 18 nm thick LPS layer (yellow), peptidoglycan (PG), and inner membrane (IM). b) Model of the RsaA S-layer structure (EMD-3604) applied to the surface of a 100 nm diameter cylinder. c) STED fluorescence microscopy image of a CysRsaA cell labeled with STAR RED. d) 3D mesh representation of predivisional *C. crescentus* topology with absolute value of Gaussian curvature projected onto the surface (gray shading). e) Schematic of 2-color pulse-chase experiment to image the sites of S-layer assembly where fluorophores DY-480XL and STAR RED were added to CysRsaA cells 30 min apart, washing in between. f) Confocal (top) and STED images (bottom) show localized assembly of natively produced S-layer at the cell poles (arrows), division plane (triangles), and crack-like features on the cell body (asterisks). g) Schematic of pulse-chase experiment where saturating quantities of purified, fluorescently labeled CysRsaA are added to the media of  $\Delta$ RsaA cells. h) Endpoint STED images show localization of newly incorporated CysRsaA protein at the cell poles (arrows), division plane (triangle), and other locations. i) Overview of analysis method. Top: Cells were horizontally aligned with the stalk on the left side and the cell boundary was identified (non-gray region). Middle: S-layer was identified in both channels via intensity thresholding, and the binary image is projected along the normalized cell axis. Bottom: The projected image created two binary profiles of the S-layer for the upper and lower half of the cell in each color channel (red and green lines). j) S-layers produced natively (red, representative cell in red boxed image from Fig 1f) or by exogenous protein addition (blue, representative cell in blue boxed image from Fig 1h) show preferential incorporation at the cell poles and division plane, while control cells (black, representative cell in black boxed image from Fig 1c) show uniform labeling. Shaded regions show 95% confidence intervals for n=81, 75, and 57 cells for native, exogenous, and control cells, respectively. Scale bars = 1  $\mu$ m except where noted.

72 to the N-terminus of RsaA, which includes a single cysteine residue<sup>13</sup> (Supp Fig. 1, Methods).  
73 CysRsaA-producing cells divide normally and create a stable S-layer at a rate similar to that of  
74 WT cells, and protein can be extracted and purified as a monomeric species (Supp Fig. 1).

75 Covalently modifying CysRsaA with membrane-impermeable fluorophores via  
76 maleimide chemistry is a robust, highly specific labeling scheme for RsaA and enables live-cell  
77 STimulated Emission Depletion (STED) fluorescence microscopy showing a complete S-layer  
78 (Figure 1c; Supp Fig. 2). Pulse-chase STED imaging of living cells was performed using DY-  
79 480XL as the pulse fluorophore and STAR RED as the chase with a 30 min delay (Figure 1e,f).  
80 Using only stalked and predivisional cells oriented in the same direction, we found highly  
81 localized S-layer assembly in growing cells characterized largely by new protein enrichment at  
82 both cell poles and the division plane (Figure 1f,i,j; Supp Fig. 3), in agreement with observations  
83 by electron microscopy<sup>25</sup>. However, high-efficiency labeling coupled with super-resolution  
84 STED imaging revealed nano-scale crack-like features of new RsaA on the cell body, indicating  
85 additional sites of localized S-layer assembly (Figure 1f).

86 We sought to determine the factors that contribute to S-layer assembly by examining how  
87 RsaA secretion, cell wall growth, and the presence of an existing S-layer structure affect the  
88 location of S-layer assembly in living cells. To determine whether RsaA secretion is necessary to  
89 localize S-layer assembly, we added purified, fluorescently labeled CysRsaA to cultures of cells  
90 with a genomic deletion of the *rsaA* gene ( $\Delta$ RsaA). Saturating quantities (600 nM) of DY-480XL  
91 labeled CysRsaA were introduced as a pulse, followed by a wash, 30 min of cell growth, and  
92 another saturating quantity of STAR RED labeled CysRsaA as chase (Figure 1g). This  
93 experiment revealed that exogenously added CysRsaA preferentially incorporates at the poles  
94 and division plane (Figure 1h), in addition to increased incorporation along the cell body (Figure

95 1j, blue) compared to native S-layer assembly (Figure 1j, red). Previous immuno-gold staining  
96 and electron microscopy of RsaF, the outermost component of the RsaA secretion apparatus,  
97 indicated diffuse localization<sup>23,26</sup>. Therefore, localized S-layer assembly occurs independent of  
98 RsaA secretion.

99 To investigate the effect of changing cell wall surface area on S-layer assembly, we  
100 manipulated peptidoglycan insertion using the specific MreB perturbing compound, A22<sup>27</sup>.  
101 Under normal conditions, the cell wall grows mainly at the polar-proximal base of the stalk and  
102 around the middle of the cell body, which eventually becomes the division plane<sup>2</sup>. These regions  
103 alone are insufficient to explain localized S-layer assembly due to the additional appearance of  
104 signal at the pole opposite the stalk (Figure 1j). At 2  $\mu\text{g}/\text{mL}$ , A22 delocalizes MreB but still  
105 allows some peptidoglycan addition along the cell body, leading to lemon-shaped cells that  
106 divide slowly<sup>27</sup> (Supp Fig. 4). At 25  $\mu\text{g}/\text{mL}$ , A22 fully inhibits peptidoglycan insertion and  
107 surface area addition stops completely except at division planes where constriction began before  
108 drug exposure<sup>27</sup> (Supp Fig. 4). Using a pulse-chase labeling scheme after drug treatment (Figure  
109 2a), we found that cells treated with 2  $\mu\text{g}/\text{mL}$  A22 maintain bipolar localized S-layer assembly,  
110 but the amount of new RsaA incorporated along the cell body increased (compare red and green  
111 highlighted columns in Figure 2b,c). At 25  $\mu\text{g}/\text{mL}$  A22, bipolar localized S-layer assembly is  
112 disrupted as evidenced by a decrease in signal at both poles (Figure 2b,c, black). If PG insertion  
113 were the only driver of S-layer assembly, disruption should have occurred only at the stalked  
114 pole, rather than both.

115 Treating cells with cephalixin prevents cell division by inhibiting peptidoglycan insertion  
116 at the division plane<sup>28</sup> (Supp Fig. 5). In cephalixin-treated cells, S-layer assembly follows  
117 untreated localization patterns, but with more crack-like features of new RsaA on the

118

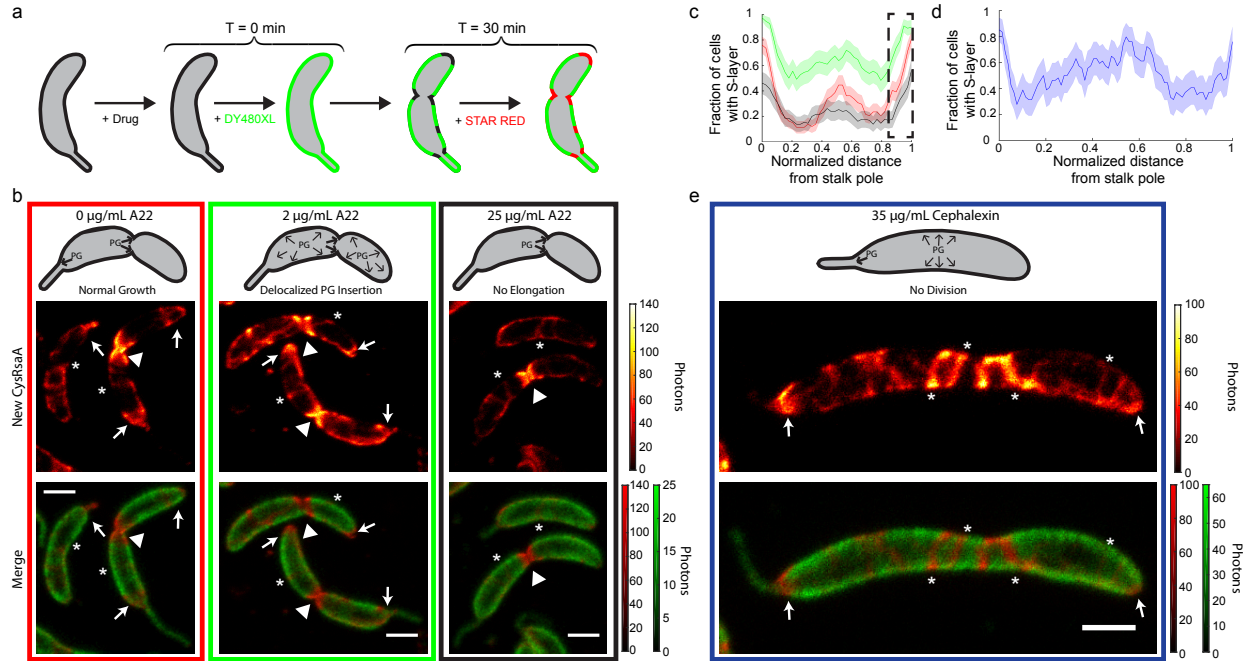

119

**Figure 2.** *S-layer* assembly on the cell body spatially correlates with cell wall growth whereas assembly at the poles correlates with surface area production. a) Schematic of pulse-chase labeling of CysRsaA cells treated with A22 (to inhibit MreB) for 1 hr or cephalaxin (to inhibit cell division) for 3 hrs. b) Upper: Schematic showing effect of A22 treatment on PG insertion in *C. crescentus*, where untreated cells add PG primarily at the stalk pole and division plane, cells treated with 2 µg/mL A22 exhibit delocalized PG insertion along the entire cell with enrichment at the division plane, and cells treated with 25 µg/mL A22 have PG insertion exclusively at the division plane. Lower: STED images of S-layer assembly for treated cells with signal at the poles, division planes, and crack-like features marked by arrows, triangles, and asterisks, respectively. c) Quantitation of S-layer assembly localization on cells treated with 2 µg/mL A22 (green) show similar degrees of polar localization, but enhanced localization along the cell body compared to untreated cells (red curve; reproduced from Fig 1j). Polar localized S-layer assembly is decreased in cells treated with 25 µg/mL A22 (black), including the pole opposite the stalk (black dashed box). Shaded regions show 95% confidence intervals for n=81, 54, and 63 cells for 0 µg/mL, 2 µg/mL, and 25 µg/mL A22 treatment, respectively. d) Quantitation of S-layer assembly localization on cells treated with 35 µg/mL cephalaxin show localization at both poles. Shaded region shows 95% confidence interval for n=25 cells. e) Upper: Schematic showing effect of 35 µg/mL cephalaxin, which halts PG insertion during cell division. Bottom: STED image of CysRsaA cell treated with cephalaxin shows localized S-layer assembly at both poles (arrows) while also adding S-layer at crack-like features (asterisks) along the cell body. Scale bars = 1 µm

120 significantly elongated cell body (Figure 2d,e). Taken together, both drug treatments show that  
121 S-layer assembly on the cell body appears to correlate with localized cell wall growth while  
122 bipolar localization is not driven by PG insertion alone.

123 Physically removing the S-layer from a CysRsaA cell provides a clean surface with  
124 which to observe the cell replacing its own S-layer, which we term *de novo* assembly. Calcium  
125 depletion (50  $\mu\text{M}$   $\text{CaCl}_2$  instead of 500  $\mu\text{M}$   $\text{CaCl}_2$  normally present in minimal growth medium)  
126 has been shown to cause shedding of the RsaA S-layer<sup>29,30</sup>. Upon reintroducing 500  $\mu\text{M}$   $\text{CaCl}_2$ , a  
127 new S-layer is produced on the surface of *C. crescentus* (Figure 3a). A time course of *de novo* S-  
128 layer assembly using only one fluorophore label at different time points displays the appearance  
129 of several S-layer patches per cell within an hour of calcium introduction (Figure 3b,c). By 2 hrs,  
130 cells have produced a mostly complete S-layer, which agrees with the 2 hr doubling time of *C.*  
131 *crescentus* (Figure 3c; Supp Fig. 6). Localization analysis of *de novo* S-layer assembly at 30 min  
132 reveals its exclusion at the poles in sharp contrast to S-layer assembly in cells with a pre-existing  
133 S-layer, which prefers the poles and division plane (red curve, Figure 3j).

134 To determine how these patches grew, we performed pulse-chase imaging of *de novo* S-  
135 layer assembly (Figure 3d). This experiment revealed that initial S-layer patches expand from the  
136 perimeter of each patch (Figure 3e), consistent with nucleation and growth characteristic of *in*  
137 *vitro* SLP crystallization observed by time-resolved atomic force microscopy<sup>10,31</sup>. To further  
138 evaluate this mode of assembly, very low concentrations (2.5 to 20 nM) of purified, STAR RED  
139 labeled CysRsaA were added to cultures of  $\Delta\text{RsaA}$  cells and puncta were observed (Figure 3f,g).  
140 The number of puncta appeared dependent on CysRsaA concentration whereas the number of  
141 molecules in each punctum did not positively correlate with CysRsaA concentration from 5 to 20  
142 nM (Figure 3g,k). Adding 5 nM of exogenously purified and labeled DY-480XL CysRsaA



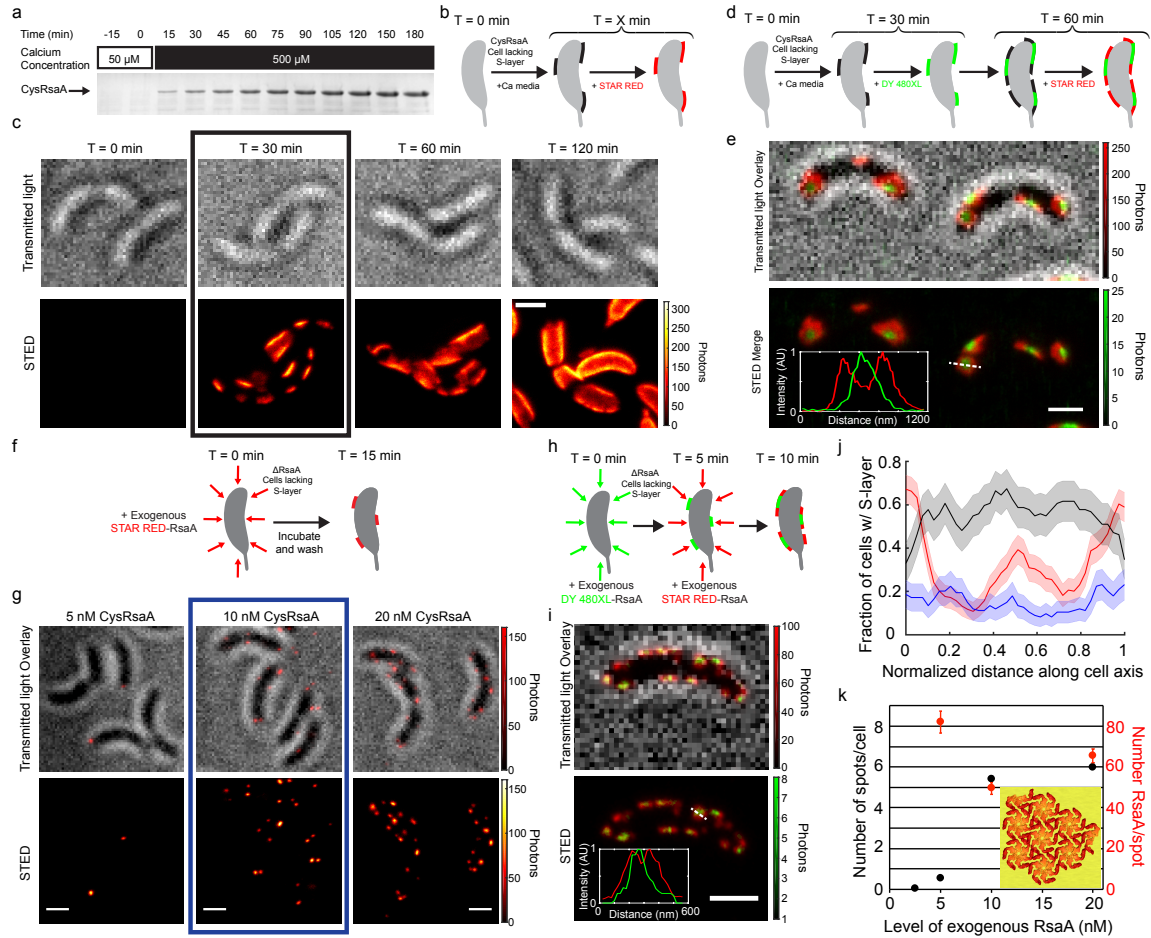

**Figure 3.** *In the absence of an existing S-layer structure, RsaA crystallizes on the cell surface with localization dependent on pre-existing crystal size.* a) Coomassie-stained SDS-PAGE of protein samples extracted from the surface of CysRsaA cells grown in low calcium M2G (50  $\mu\text{M}$   $\text{CaCl}_2$ ,  $t < 0$  min) and then switched to 500  $\mu\text{M}$   $\text{CaCl}_2$  ( $0 < t < 180$  mins) show *de novo* accumulation of the S-layer. b) Schematic of *de novo* S-layer assembly experiment where CysRsaA cells are resuspended in M2G with 500  $\mu\text{M}$   $\text{CaCl}_2$  and then their S-layer is labeled with STAR RED. c) A STED imaging time course of STAR RED labeled CysRsaA cells shows that *de novo* assembly of a new S-layer occurs at discrete patches that grow larger over time. d) Schematic of 2-color pulse-chase labeling between 30 and 60 minutes after calcium addition. e) STED imaging reveals growth of S-layer patches from their perimeter (red signal at the edges of green patch) and is confirmed by line profiles of the dashed line (inset). f) Schematic of experiment where low concentrations of STAR RED-labeled CysRsaA are incubated with  $\Delta\text{RsaA}$  cells for 15 mins. g) STED images show exogenous CysRsaA nucleates small puncta of S-layer. h) Schematic of 2-color stepwise addition of 5 nM DY-480XL labeled CysRsaA followed by 10 nM STAR RED labeled CysRsaA. i) STED imaging shows that puncta on the cell surface formed by exogenous addition of purified CysRsaA grow from their perimeter, confirmed by line profiles of the dashed line (inset). j) Quantitation of S-layer assembly localization for native S-layer assembly (red), *de novo* native S-layer assembly (black), and S-layer assembly by exogenous addition of labeled CysRsaA (blue). Shaded regions show 95% confidence intervals for  $n=100$ , 50, and 65 cells for native, *de novo*, and exogenous protein addition, respectively. k) Quantitation of the number of S-layer puncta and average number of RsaA molecules per punctum on  $\Delta\text{RsaA}$  cells upon addition of purified CysRsaA protein. A model of an RsaA crystal of about the measured size is shown (inset). Scale bars = 1  $\mu\text{m}$  (panels c, e, g, i)

144 followed by 10 nM of STAR RED CysRsaA revealed expansion of fluorescent puncta from the  
145 perimeter, as observed with two-color native *de novo* S-layer assembly (Figure 3e,h,i). These  
146 observations are consistent with each punctum representing a nucleated RsaA protein crystal of  
147 at least 7 RsaA hexamers (Figure 3k, inset). Large, natively grown S-layer crystals initially  
148 exclude the cell poles (Figure 3c,j); however, introducing exogenously purified RsaA to  $\Delta$ RsaA  
149 cells creates small S-layer crystals that appear more uniformly distributed along the cell axis  
150 (Figure 3j).

151         If *de novo* S-layer assembly occurs through nucleation and 2D crystallization of RsaA,  
152 then protein self-assembly could also be responsible for continuous S-layer growth. Since protein  
153 crystallization is concentration-dependent, we predict that once secreted, RsaA monomers should  
154 be able to diffuse while non-covalently anchored to the LPS outer membrane until incorporated  
155 into a nucleating or growing S-layer crystal. Indeed, at 1 nM exogenous CysRsaA, cells exhibit  
156 weak diffuse fluorescence suggestive of diffusing molecules (Supp Fig. 7). Therefore, we  
157 employed SMT to dynamically track the location of individual CysRsaA monomers anchored to  
158 the LPS outer membrane.  $\Delta$ RsaA cells were first pre-treated with 2.5 nM Cy3-CysRsaA to form  
159 sparse, immobile S-layer crystalline patches or “seeds” on the LPS outer membrane (Figure 4a,  
160 green). Then, 1 nM AlexaFluor647-CysRsaA (Figure 4a, red) was added to the growth media,  
161 allowing single molecules to flow into the microscope’s viewing area. Once attached to the LPS  
162 outer membrane, CysRsaA molecules were imaged for several minutes at a time (Figure 4b).  
163 CysRsaA tracks included entirely immobile molecules, entirely mobile molecules, and molecules  
164 that appear to sample mobile and immobile states during the experiment (Figure 4b,c; Supp Fig.  
165 8, 9). Correlating mobility of the molecule with distance measurements from a nearby S-layer  
166 seed (Cy3 signal) reveals behavior consistent with binding at the edge of a growing S-layer

167

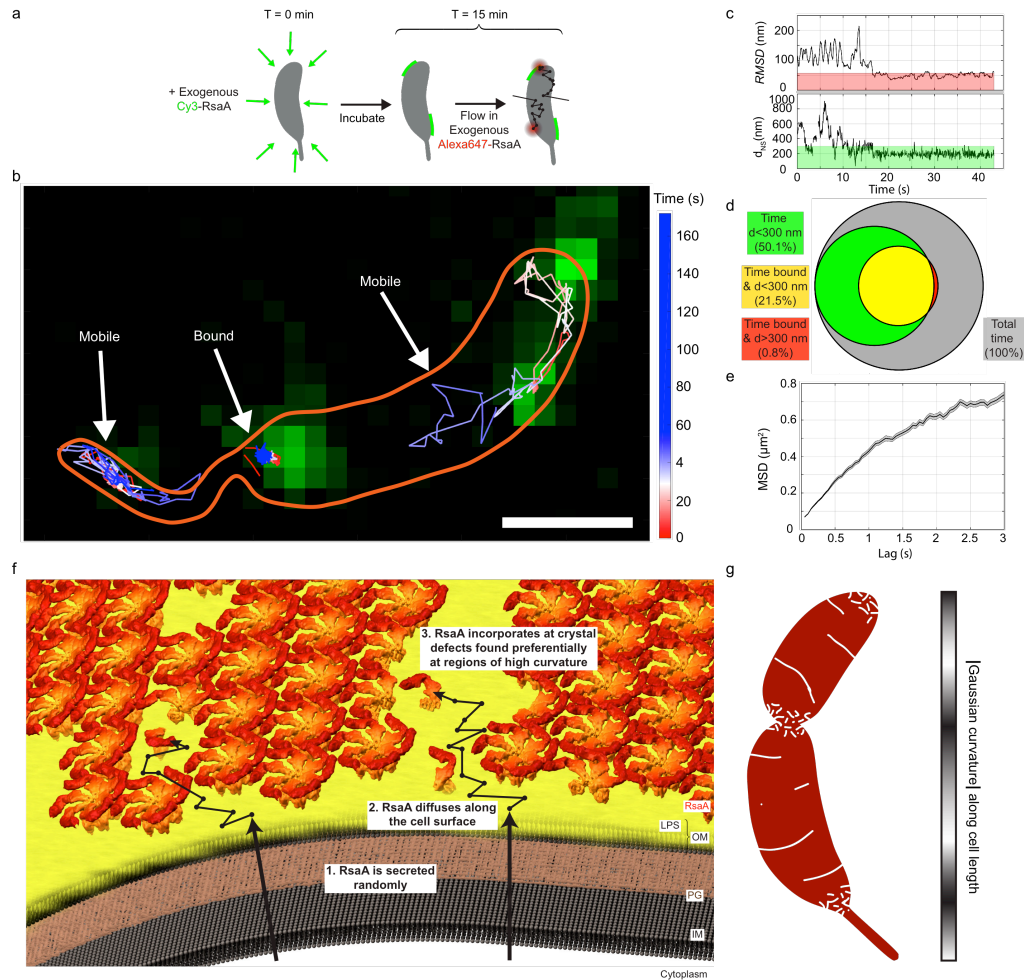

**Figure 4.** *RsaA* monomers are mobile on the outer bacterial surface and bind to *S*-layer crystals. a) Schematic of 2D, 2-color single-molecule tracking of CysRsaA on a  $\Delta$ RsaA cell. Cells were incubated with 2.5 nM Cy3-labeled CysRsaA (green) to create small fluorescent seed crystals. Single molecules of AlexaFluor647 labeled CysRsaA diffused through the agarose mounting pad and bound to the cell surface. b) Single-molecule tracking (SMT) shows mobile and immobile single-molecule tracks. The cell boundary is sketched in orange. Scale bar = 1  $\mu\text{m}$ . c) Upper: The RMSD from a nearby seed of an example track shows binding of the molecule from  $\sim$ 16–43s. Binding is defined as  $\text{RMSD} < 57.3$  nm (red shaded region). Lower: Distance from the nearest nucleation seed ( $d_{NS}$ ) for the same track shows the molecule binds  $\sim$ 200 nm from the center of a crystal patch. Green shaded region shows the 300 nm threshold used for determining crystal patch proximity. d) A quantitative Venn diagram displaying the total time (grey area), and the fractions of time molecules spend near a crystal patch (green area), bound (yellow area), and bound but not near a crystal patch (red area), shows that when molecules cease diffusing, they are almost always in close proximity to an existing crystal patch. e) MSD analysis from 3D SMT of AlexaFluor647 labeled CysRsaA molecules revealing a diffusion coefficient of  $D = 0.077$   $\mu\text{m}^2/\text{s}$ . Shaded regions represent SEM. f) A generalizable model for *S*-layer assembly including secretion, diffusion, and incorporation at gaps within the *S*-layer lattice. g) A model for *S*-layer crystal boundaries/defects (white) mapped onto the *C. crescentus* surface (red), suggested by Gaussian curvature calculations (gray colorbar, right).

169 crystal (Figure 4c,d; Supp Fig. 9). Tracking CysRsaA anchored to the LPS outer membrane  
170 while utilizing a double helix point-spread function for 3D localization<sup>18</sup> allowed calculation of  
171 an apparent diffusion coefficient,  $D=0.077 \mu\text{m}^2/\text{s}$  (Figure 4e, Methods). A comparison with the  
172 recent SMT of a similarly sized transmembrane signaling protein anchored to the inner  
173 membrane of *C. crescentus*, CckA ( $D=0.0082 \mu\text{m}^2/\text{s}$ )<sup>32</sup>, reveals that CysRsaA diffuses an order  
174 of magnitude faster.

175         Based on these observations, we propose a model of S-layer assembly in *C. crescentus*  
176 whereby RsaA monomers are secreted randomly and subsequently explore the LPS outer  
177 membrane by diffusion until captured and incorporated into the growing crystalline S-layer  
178 structure (Figure 4f). While SMT of RsaA was performed on  $\Delta\text{RsaA}$  cells, it is plausible that  
179 RsaA diffuses either on or within the LPS outer membrane, depending on whether an existing S-  
180 layer structure is present above the site of RsaA secretion. Protein diffusion within the LPS outer  
181 membrane in gram-negative bacteria has been observed by fluorescence recovery after  
182 photobleaching, but individual LPS molecules are immobile<sup>33</sup>. In *C. crescentus*, the LPS outer  
183 membrane is  $\sim 18$  nm thick, while the size of a single RsaA monomer can be approximated by its  
184 radius of gyration ( $R_g=5.8$  nm)<sup>14,30</sup>.

185         Our results imply that continuous S-layer crystallization occurs at gaps, defects, and grain  
186 boundaries within the S-layer structure caused by localized cell wall growth or the inherent  
187 topology of the cell surface (Figure 4g). Increasing localized cell wall growth along the cell body  
188 (treatment with  $2 \mu\text{g}/\text{mL}$  A22) increases S-layer assembly at that location; however, preventing  
189 cell elongation (treatment with  $25 \mu\text{g}/\text{mL}$  A22) disrupts S-layer assembly at both poles,  
190 indicating that an additional factor is coordinating this process (Figure 2c)<sup>2</sup>. When the cell lacks  
191 an existing S-layer and assembles a new one using a few large crystalline patches, S-layer

192 coverage initially excludes the poles rather than preferentially assembling there (Figure 3j).  
193 Decreasing the size of nucleated S-layer crystals by adding exogenous RsaA to  $\Delta$ RsaA cells  
194 disrupts polar exclusion (Figure 3j), indicating that an underlying tether within the LPS is not  
195 responsible for localizing S-layer assembly.

196 The molecular defects and boundaries created by imposing a large crystalline lattice on a  
197 variably curved surface are sufficient to explain these observations<sup>20,21</sup>. Regions of non-zero  
198 Gaussian curvature values on a 3D model of the *C. crescentus* topology correlate with the polar  
199 and divisional regions of S-layer assembly observed in this study (Figure 1d,j, 4g). At these  
200 regions, we expect small crystalline patches with more defects, allowing for more local RsaA  
201 incorporation. Along the cell body, changes in curvature are less dramatic, which produce longer  
202 grain boundaries between large crystalline patches<sup>20,21</sup>. The crack-like features of new RsaA we  
203 observe on the cell body further support the model that S-layer assembly patterning reflects  
204 growth at natural imperfections in the S-layer crystalline lattice (Figure 1f, 2b,e).

205 In *C. crescentus*, RsaA deletion and the subsequent loss of an S-layer disrupts normal cell  
206 growth, suggesting a connection between the S-layer structure and cellular fitness<sup>30</sup>. Given the  
207 central role of RsaA crystallization in S-layer assembly and this connection to fitness, the  
208 protein's ability to self-assemble may drive natural selection of the RsaA amino acid sequence.  
209 Remarkably small but stable RsaA protein crystals consist of only ~50 molecules (Figure 3g,k),  
210 suggesting that efficient nucleation at low concentrations may be another selectable trait  
211 supporting protein self-assembly. SLPs are exceptionally diverse in sequence, varying widely in  
212 size (40-200 kDa) and fold<sup>4</sup>. Functional convergence of diverse crystalline structures can be  
213 rationalized by selection driven by protein self-assembly, which can occur independently of  
214 overall fold and instead requires just a few key surface residues making symmetric, planar

215 crystal contacts<sup>34,35</sup>. Similarly, diverse SLPs in archaea prefer charged (acidic or basic) amino  
216 acids to facilitate nutrient uptake through the nanoporous S-layer—a function that evolves  
217 independently of protein fold<sup>36</sup>.

218 The mechanisms by which bacteria build, maintain, and evolve their S-layers are  
219 important to human health and our ability to treat and respond to bacterial pathogens such as *C.*  
220 *difficile*, *A. salmonicida*, and *B. anthracis*<sup>37–39</sup>. Additionally, S-layers have been exploited as  
221 nanomaterials in a variety of applications<sup>4,40</sup>, including high-density organization and display of  
222 organic or inorganic molecules tethered to RsaA in particular<sup>41,42</sup>. This study proposes a  
223 mechanism by which bacteria can control extracellular structures without direct intracellular  
224 feedback, exploiting the biophysics of macromolecular 2D crystalline self-assembly on curved  
225 3D surfaces. In particular, defects and natural imperfections within the S-layer lattice serve as  
226 sites of new S-layer growth. Further manipulation of this seemingly unsupervised assembly  
227 pathway may lead to treatments that target cell surface structures such as the S-layer or allow  
228 enhanced utilization of S-layers as self-assembling macromolecular nanomaterials.

229

230 Materials and Methods

### 231 **Strains**

232 Three strains were used in this study and are available from the corresponding author  
233 S.W. upon request. *C. crescentus* NA1000, which is referred to as wild type (WT) throughout the  
234 text, was used as a control for fluorescent labeling, S-layer protein production, and drug  
235 treatment response. An RsaA-negative strain of NA1000, referred to as  $\Delta$ RsaA, was generated  
236 via clean genomic deletion. We amplified 802 bp upstream and 806 bp downstream of *rsaA*  
237 using primer pairs RsaAUpstreamF/R (5'-

238 CTACGTAATACGACTCAGGCCGCGATCAGTGCCGACGCG-3' and 5'-  
239 ACGTTCGCTTAGGCCATGAGGATTGTCTCCCAAAAAAATCCCACACCC-3') and  
240 RsaADownstreamF/R (5'-TGGCCTAAGCGAACGTCTGATCCTCGCCTAG-3' and 5'-  
241 CGGCCGAAGCTAGCGGGCCATGGTGGCCATCTGGATC-3'). The two fragments were  
242 inserted into SpeI and EcoRI-linearized pNPTS138 by Gibson assembly. The resulting plasmid  
243 was electroporated into *C. crescentus* NA1000. Deletion mutant was isolated using a two-round  
244 selection approach<sup>43</sup>.

245 For fluorescence microscopy and protein purification, a cysteine mutant of RsaA,  
246 CysRsaA, was created as previously described<sup>13</sup>. Briefly, RsaA with a 7-residue N-terminal tail  
247 was cloned into the p4A vector and introduced to background strain JS1023 by  
248 electroporation<sup>13,17</sup>. JS1023 contains the repBAC operon to enable plasmid replication as well as  
249 an amber mutation within the native *rsaA* gene and a disruptive insertion within the gene for an  
250 S-layer associated protease, *sap*<sup>17</sup>.

### 251 **S-layer Protein Purification**

252 Purified RsaA in the absence of CaCl<sub>2</sub> was previously shown to partially unfold at  
253 28°C<sup>30</sup>. Therefore, CysRsaA samples were kept cold (<4°C) at all times unless otherwise noted.  
254 CysRsaA protein was purified similarly to previously reported methods<sup>30,44</sup>. CysRsaA-producing  
255 *C. crescentus* cells were grown to early stationary phase at 30°C in PYE medium, shaking at 200  
256 rpm. The culture was then pelleted by centrifugation and stored at -80°C. Approximately 1 g of  
257 cell pellet was thawed on ice, re-suspended with 10 mL of ice cold 10 mM HEPES buffer pH  
258 7.0, and centrifuged for 4 min at 18,000 rcf. This washing step was performed three times. The  
259 pellet was then separated into 10 aliquots and 600 µL of 100mM HEPES buffer pH 2.0 was  
260 added to each aliquot. These cell suspensions were incubated on ice for 15 min and then spun for

261 4 min at 18,000 rcf. The supernatants were then pooled and neutralized (pH = 7) by the addition  
262 of 5 N NaOH. To remove free divalent cations and reduce cysteine side chains, 5 mM  
263 Ethylenediaminetetraacetic acid (EDTA) and 1 mM Tris(2-carboxyethyl)phosphine  
264 hydrochloride (TCEP) were added. The protein solution was then syringe filtered using a 0.22  
265  $\mu$ m PES syringe filter and 5 mL were injected onto a Highload Superdex200 16/600 size  
266 exclusion column (GE Healthcare). During size exclusion chromatography, the running buffer  
267 consisted of 50 mM Tris/HCl pH 8.0 and 150 mM NaCl. Monomeric CysRsaA consistently  
268 eluted at approximately 0.55 column volumes (Supp Fig. 1). From 1 g of pelleted cells, we  
269 consistently purified at least 1 mg of monomeric CysRsaA protein. Purity was assessed by SDS-  
270 PAGE (Supp Fig. 1).

#### 271 **Time-resolved Blot**

272 WT or CysRsaA-producing *C. crescentus* cells were grown in modified M2G medium  
273 containing 50  $\mu$ M CaCl<sub>2</sub> (normally 500  $\mu$ M) to log phase (OD<sub>600nm</sub> = 0.5). At t=0 min, CaCl<sub>2</sub>  
274 was adjusted to 500  $\mu$ M using a sterile 1 M stock. The culture was then incubated at 30°C,  
275 shaking at 180 rpm with 0.5 mL aliquots removed every 15 minutes. Aliquots were immediately  
276 spun down and snap frozen in LN<sub>2</sub>. Soluble RsaA extraction was performed as above (without  
277 chromatography) and analyzed by SDS-PAGE.

#### 278 **Fluorescent Labeling of the S-layer Protein**

279 CysRsaA protein was fluorescently labeled by covalent maleimide chemistry both *in vivo*  
280 and *in vitro*. For *in vivo* experiments, 1  $\mu$ M STAR RED (Abberior) or DY-480XL (Dyomics)  
281 Cys-reactive fluorescent label was introduced to 1 mL of log-phase (0.1 < OD<sub>600nm</sub> < 1.0) CysRsaA  
282 cells in minimal medium (M2G) at 30°C. After 15 minutes, cells were washed with 1 mL of  
283 M2G once if another fluorophore was to be added next or twice if the next step was imaging.



284 Complete labeling was evidenced by highly spatially complementary fluorescent images in  
285 pulse-chase labeled cells (Fig. 1b).

286 For *in vitro* experiments, purified CysRsaA was buffer exchanged into 50 mM HEPES  
287 pH 7.0 and 150 mM NaCl using a 30 kDa MWCO centrifugal concentrator (Sartorius).  
288 Overnight labeling of CysRsaA protein (>20  $\mu$ M) was performed on ice with the addition of 1  
289 mM TCEP and at least 5-fold stoichiometric excess of maleimide-derivatized STAR RED, DY-  
290 480XL, Cy3 (Lumiprobe), or AlexaFluor647 (ThermoFisher). The next day, three successive  
291 1:30 dilutions were performed to remove unbound dye molecules using a 30 kDa MWCO  
292 centrifugal concentrator (Sartorius) and buffer containing 50 mM Tris/HCl pH 8.0 and 150 mM  
293 NaCl. Absorbance measurements at 280 nm and the known absorbance peak for each  
294 fluorophore determined labeling efficiency, which varied from 50-90%.

## 295 **Growth Curves**

296 For growth curve analysis of WT and  $\Delta$ RsaA *C. crescentus* strains, 10  $\mu$ L of mid-log  
297 phase cultures ( $OD_{600nm}=0.5$ ) were added to 90  $\mu$ L of M2G containing varying amounts of A22  
298 (Cayman Chemical) or cephalixin (Frontier Scientific) in a sterile, black-walled, 96-well  
299 transparent plate (Corning). While incubating the plate at 29°C and shaking at 600 rpm between  
300 readings,  $OD_{600nm}$  was measured every 5 minutes for up to 23 hours using an Infinite M1000  
301 microplate reader (Tecan).

## 302 **Confocal and STED Microscopy**

303 Images were acquired on a bespoke 2-color fast scanning STED microscope described  
304 previously<sup>22</sup>. Briefly, the pulsed 750 nm depletion beam is provided by a titanium-sapphire  
305 mode-locked oscillator (Mira 900D, Coherent) running at 80 MHz, providing an average power  
306 of 120-130 MW/cm<sup>2</sup> at the sample plane. A vortex phase plate imparts the STED donut shape

307 (RPC Photonics). 530 nm and 635 nm pulsed diode lasers are used for excitation (LDH-P-FA-  
308 530B & LDH-P-C-635B, PicoQuant), providing an average power of 40-60 kW/cm<sup>2</sup> and 50-80  
309 kW/cm<sup>2</sup>, respectively. The laser beams are focused and fluorescence is collected through an oil  
310 immersion objective (Plan Fluor 100x/1.3 NA, Nikon). A 7.5 kHz resonant mirror (Electro-  
311 Optical) scans the beams along the fast axis, while the slow axis is scanned using a piezo stage  
312 (PD1375, Mad City Labs). Fluorescence is collected through a ~0.7 Airy unit (AU) and 0.8 AU  
313 pinhole (red and green channels, respectively), spectrally filtered from 650-710 nm or 550-615  
314 nm, and detected on a Si APD detector (SPCM-ARQH-13, Perkin Elmer). Microscope control  
315 and image acquisition arose from a custom LabView program running on an FPGA (PCIe-  
316 7842R, National Instruments). Confocal images are taken using no depletion laser, a pixel size  
317 of 100 nm, and an average pixel dwell time of ~0.25 ms/pixel. STED images have a pixel size of  
318 20 nm, and an average pixel dwell time of 0.1 ms/pixel for the red channel. Images in the green  
319 channel are the sum of two frames, smoothed with a  $\sigma = 0.9$  pixel Gaussian filter and an average  
320 pixel dwell time of 30  $\mu$ s/pixel/frame.

### 321 **Binary Cell Profile Analysis**

322 S-layer cell profiles were analyzed using a custom MATLAB algorithm (Supp Fig. 3).  
323 STED images were aligned to the gradient of the transmitted light image via cross-correlation to  
324 correct for sample drift during scanning. Well-separated cells were selected by hand and aligned  
325 to be horizontal with the stalk on the left side using a radon transform (except Fig 3j, where  
326 stalks cannot easily be identified on cells for *de novo* assembly and exogenous addition  
327 experiments). A cell axis was determined by fitting a second order polynomial to the maximum  
328 intensity transmitted light pixels. For the cephalixin treated cells, a smoothing spline was used  
329 instead of a second order polynomial due to the longer cell length. Cells were classified as

330 swarmer or stalked, and swarmer cells were omitted from analysis. For each cell, a 200 nm wide  
331 cell outline was defined. For conditions with a mostly complete S-layer (Fig 1d and 2c), first the  
332 outer cell boundary was determined by thresholding a normalized sum of the two-color channels,  
333 and then this outer boundary was eroded to form the 200 nm cell outline. For analysis including  
334 conditions with an incomplete S-layer (Fig 3e), the center of the cell outline was determined by  
335 finding the maximum gradient of the transmitted light image around the cell axis, followed by  
336 expansion to a 200 nm wide cell outline. Then, the presence of S-layer was determined by  
337 applying a binary intensity threshold to the STED images smoothed using a Gaussian filter with  
338  $\sigma=0.9$  pixels (18 nm). An upper and lower binary cell profile were determined by projecting each  
339 pixel onto the cell backbone and binning into 40 equi-length bins, where a single pixel identified  
340 as positive for S-layer in a bin makes the entire bin positive. The fraction of cells with S-layer at  
341 each position along the normalized cell axis can then be computed (combining both upper and  
342 lower halves), yielding a binomial observation for the probability of finding S-layer at a given  
343 position,  $\hat{p}(x)$ . 95% confidence intervals were determined using the Wilson score interval. All  
344 imaging experiments except for Figures 2e, 3e, and 3i were performed on cell populations from  
345 at least two independently created samples.

### 346 **Puncta Quantification**

347 Counting the number of crystal puncta per cell upon exogenous addition of RsaA was  
348 performed by identifying spots with signal greater than 10 standard deviations above  
349 background. Quantitation of the number of RsaA monomers per punctum was performed using a  
350 custom MATLAB algorithm. In-focus puncta were fit using non-linear least squares to an  
351 asymmetric Gaussian. These fits were used to determine the number of photons per punctum.  
352 The number of photons per RsaA monomer was determined by imaging single molecules of

353 RsaA-STAR RED *in vitro* on a poly-L-lysine coated coverslip. By calculating the photons per  
354 molecule of both STED and confocal images of the *in vitro* sample, a photobleaching correction  
355 factor was determined by comparing the number of molecules identified in both confocal and  
356 STED images of identical fields-of-view. The final number of RsaA monomers per punctum was  
357 corrected for photobleaching as well as the *in vitro* labeling efficiency of the exogenously added  
358 RsaA, as determined by absorbance at 280 nm and the absorbance of STAR RED at 640 nm.

### 359 **2D & 3D Single-Particle Tracking Microscopy**

360 Images were acquired on a custom-built 2-color inverted microscope (Olympus, IX71)  
361 for imaging cy3 and AlexaFluor647 (Supp Fig 10). Labeled biological samples were mounted on  
362 a 2D micrometer stage and in contact with an oil-immersion objective (Olympus, 100x, 1.4 NA,  
363 UPLANSAPO). Shutters were used in a sequential, interleaved fashion, where the sample was  
364 first exposed to the 641 nm laser (Coherent Cube, 100 mW) for 1.8 s at an intensity of 88.5  
365 W/cm<sup>2</sup>, then the 514 nm laser (Coherent Sapphire, 100 mW) for 0.2 s at an intensity of 1.6  
366 W/cm<sup>2</sup>. Emission is collected with the objective, passes through a dichroic filter (Semrock,  
367 FF425/532/656-Di01), and another dichroic filter (594LP), which allows us to spectrally separate  
368 the emission. Alexa647 emission is detected on one EMCCD camera (Andor, DU-897U-CS0-  
369 #BV) with two emission filters (Chroma, 680-60; Chroma, 655LP) and Cy3 is detected on a  
370 separate EMCCD camera (Andor, DU-897U-CS0-#BV) with an emission filter (Semrock, 578-  
371 105), both recorded at a framerate of 20 frames/s and an electron-multiplying gain of 200.  
372 During the first ~10 seconds of acquisition, the intensity of the 641 nm laser is briefly increased  
373 to a higher intensity to allow the fluorescent dyes to bleach down approximately to the single-  
374 molecule regime before reducing the intensity for optimal tracking. Spatial correlation between  
375 the two cameras is determined by detecting Tetraspeck beads (Invitrogen), which appear in both

376 channels. 3D tracking was performed with a double-helix phase mask placed at the Fourier plane  
377 in the detection side of our microscope. Imaging conditions are similar to our 2D single-particle  
378 tracking experiments, except the 641nm laser was used for detecting labeled RsaA molecules  
379 with an intensity of  $885 \text{ W/cm}^2$ . All image acquisition was performed through software made by  
380 Andor. Pixel size is 163 nm. All tracks shown (Figure 4b and Supp Fig. 9) are down-sampled 5X  
381 for clarity.

### 382 **3D Calibration with Fiducials**

383 In 3D single-molecule tracking, the double helix point spread function (DH-PSF) allowed  
384 extraction of the  $xyz$  position of individual emitters in the field of view<sup>45</sup>. Spatial calibrations  
385 utilized fluorescent beads (FluoSpheres 0.2  $\mu\text{m}$ , crimson fluorescent (625/645)), spin-coated  
386 from 1% polyvinyl alcohol onto a glass coverslip. Using a piezo-electric z-motion stage,  
387 calibrations were acquired over a 3  $\mu\text{m}$  range along the  $z$  axis with a 50  $\text{nm}$  step-size with 30  
388 frames measured at each  $z$ -height. This calibration step produces template images of the DH-  
389 PSF, which are used for the identification of single-molecule signals during post-processing of  
390 the raw data. All imaging was performed at  $25^\circ\text{C}$ . Using the *easyDHPSF* MATLAB program<sup>46</sup>, a  
391  $z$ -axis calibration over a 3- $\mu\text{m}$  range is obtained *via* a 2D Double-Gaussian fit, which provides us  
392 with  $xy$  positions, width, amplitudes, and offset levels of each lobe of the fluorescent bead.

### 393 **Mobility Analysis of 2D RsaA Tracking Data**

394 Images of single molecules and beads were analyzed using custom-built MATLAB code.  
395 Within one *C. crescentus* cell, a 2D symmetric Gaussian fit is applied to a single labeled RsaA  
396 molecule of interest, which provides an estimate of its  $xy$  position at that point in time. Linking  
397 together the trajectory of the same molecule over time generates tracks. In order to determine  
398 whether the detected molecules were bound or not, we first calculated the root mean squared

399 deviation (RMSD) from the mean position over a 1 s sliding window (20 frames). Bound  
400 molecules will have a relatively low RMSD (near the localization precision) compared to a  
401 molecule freely diffusing within the cell. By performing this for every track (9 tracks) within the  
402 same cell, we were able to generate a histogram of all RMSD values (6625 RMSD values),  
403 which shows a clear peak with a tail (Supp Fig. 8), where the left-most peak arises from the  
404 localization precision error for bound molecules. The Gaussian fit of the lowest RMSD  
405 population was utilized to determine a binding threshold (RMSD < 57.3 nm) corresponding to  
406  $2\sigma$  above the mean. Molecules were classified as bound if RMSD < Threshold or unbound if  
407 RMSD  $\geq$  Threshold).

#### 408 **2-Color Analysis of 2D RsaA/Nucleation Site Tracking Data**

409 The  $xy$  location of each nucleation site, labeled with Cy3, was separately determined by  
410 fitting a 2D symmetric Gaussian. The locations of these nucleation sites was found to be  
411 stationary over the  $\sim 15$  minute imaging period. Using the 2D RsaA trajectories analyzed earlier,  
412 we calculated the  $d_{NS}$ , which is defined as the distance between the RsaA molecule and the  
413 nearest nucleation site. By calculating both the RMSD and the  $d_{NS}$ , we can categorize each frame  
414 as the following: (a) bound only, (b) bound and close to a nucleation site, or (c) close to a  
415 nucleation site only.

#### 416 **3D Mean Square Displacement (MSD) Analysis**

417 Images of RsaA imaged in 3D were analyzed using custom-built MATLAB code for  
418 analyzing DH-PSF data. A 2D Double-Gaussian fit was applied to each emitter in the field-of-  
419 view, which provides us with  $x$ ,  $y$ , and  $\theta$  information from the tilt of the two lobes of the double-  
420 helix. We use the calibration obtained earlier to convert our estimates to  $xyz$  values. For each  
421 individual track, the MSD is computed over a series of time lags starting from 50 ms. We then

422 pool the data over all 30 trajectories to obtain a 3D MSD plot. The diffusion coefficient is  
423 extracted by fitting the following equation to the first 4 time lags:

$$MSD_{3D} = 6D \left( \tau - \left( \frac{\tau_E}{3} \right) \right) + 2(s_1^2 + s_2^2 + s_3^2)$$

424 where  $D$  is the diffusion coefficient,  $\tau$  is the time lag,  $\tau_E$  is the exposure time of the camera (50  
425 ms), and  $s_i$  is the localization error in the  $i^{th}$  dimension ( $s_{x,y,z} = 93$  nm, 93 nm, 91 nm).

## 426 **Gaussian Curvature Analysis**

427 Point cloud localization data of positions on the *C. crescentus* surface were obtained  
428 previously by a covalently surface-attached fluorophore<sup>18</sup>. A surface mesh was extracted with the  
429 Poisson Surface Reconstruction algorithm, available through MeshLab, an open source software  
430 package<sup>47</sup>. Gaussian curvature analysis was performed as previously described<sup>22</sup>.

## 431 **Code Availability**

432 The code used in this study is either open access<sup>46,47</sup> or is described above and available  
433 upon request.

434

435

## 436 **References**

- 437 1. Figge, R. M., Divakaruni, A. V. & Gober, J. W. MreB, the Cell Shape-determining  
438 Bacterial Actin Homologue, Co-ordinates Cell Wall Morphogenesis in *Caulobacter*  
439 *crescentus*. *Mol. Microbiol.* **51**, 1321–1332 (2004).
- 440 2. Aaron, M. *et al.* The Tubulin Homologue FtsZ Contributes to Cell Elongation by Guiding  
441 Cell Wall Precursor Synthesis in *Caulobacter crescentus*. *Mol. Microbiol.* **64**, 938–952  
442 (2007).
- 443 3. Egan, A. J. F., Cleverley, R. M., Peters, K., Lewis, R. J. & Vollmer, W. Regulation of

- 444 Bacterial Cell Wall Growth. *FEBS J.* **284**, 851–867 (2017).
- 445 4. Sleytr, U. B., Schuster, B., Egelseer, E. M. & Pum, D. S-layers: Principles and  
446 Applications. *FEMS Microbiol. Rev.* **38**, 823–64 (2014).
- 447 5. Albers, S.-V. & Meyer, B. H. The Archaeal Cell Envelope. *Nat. Rev. Microbiol.* **9**, 414–  
448 426 (2011).
- 449 6. Zhu, C. *et al.* Diversity in S-layers. *Prog. Biophys. Mol. Biol.* **123**, 1–15 (2017).
- 450 7. Lau, J. H. Y., Nomellini, J. F. & Smit, J. Analysis of High-level S-layer Protein Secretion  
451 in *Caulobacter crescentus*. *Can. J. Microbiol* **56**, 501–514 (2010).
- 452 8. Pum, D., Toca-Herrera, J. L. & Sleytr, U. B. S-Layer Protein Self-Assembly. *Int. J. Mol.*  
453 *Sci.* **14**, 2484–2501 (2013).
- 454 9. Baranova, E. *et al.* SbsB Structure and Lattice Reconstruction Unveil Ca<sup>2+</sup> Triggered S-  
455 layer Assembly. *Nature* **487**, 119–122 (2012).
- 456 10. Chung, S., Shin, S.-H., Bertozzi, C. R. & De Yoreo, J. J. Self-catalyzed Growth of S  
457 layers via an Amorphous-to-Crystalline Transition Limited by Folding Kinetics. *Proc.*  
458 *Natl. Acad. Sci. U. S. A.* **107**, 16536–41 (2010).
- 459 11. Nomellini, J. F., Kupcu, S., Sleytr, U. B. & Smit, J. Factors Controlling *In Vitro*  
460 Recrystallization of the *Caulobacter crescentus* Paracrystalline S-Layer. *J. Bacteriol.* **179**,  
461 6349–6354 (1997).
- 462 12. Rad, B. *et al.* Ion-specific Control of the Self-Assembly Dynamics of a Nanostructured  
463 Protein Lattice. *ACS Nano* **9**, 180–190 (2015).
- 464 13. Amat, F. *et al.* Analysis of the Intact Surface Layer of *Caulobacter crescentus* by Cryo-  
465 electron Tomography. *J. Bacteriol.* **192**, 5855–65 (2010).
- 466 14. Bharat, T. A. M. *et al.* Structure of the hexagonal surface layer on *Caulobacter crescentus*



- 467 cells. *Nat. Microbiol.* **2**, 1–6 (2017).
- 468 15. Jones, M. D., Vinogradov, E., Nomellini, J. F. & Smit, J. The Core and O-Polysaccharide  
469 Structure of the *Caulobacter crescentus* Lipopolysaccharide. *Carbohydr. Res.* **402**, 111–  
470 117 (2015).
- 471 16. Bingle, W. H., Nomellini, J. F. & Smit, J. Linker Mutagenesis of the *Caulobacter*  
472 *crescentus* S-Layer Protein: Toward a Definition of an N-Terminal Anchoring Region and  
473 a C-Terminal Secretion Signal and the Potential for Heterologous Protein Secretion. *J.*  
474 *Bacteriol.* **179**, 601–611 (1997).
- 475 17. Ford, M. J., Nomellini, J. F. & Smit, J. S-Layer Anchoring and Localization of an S-  
476 Layer-Associated Protease in *Caulobacter crescentus*. *J. Bacteriol.* **189**, 2226–2237  
477 (2007).
- 478 18. Lee, M. K., Rai, P., Williams, J., Twieg, R. J. & Moerner, W. E. Small-molecule Labeling  
479 of Live Cell Surfaces for Three-dimensional Super-resolution Microscopy. *J. Am. Chem.*  
480 *Soc.* **136**, 14003–14006 (2014).
- 481 19. Schredl, A. T., Perez Mora, Y. G., Herrera, A., Cuajungco, M. P. & Murray, S. R. The  
482 *Caulobacter crescentus* *ctrA* P1 Promoter is Essential for the Coordination of Cell Cycle  
483 Events that Prevent the Overinitiation of DNA Replication. *Microbiol. (United Kingdom)*  
484 **158**, 2492–2503 (2012).
- 485 20. Garcia, N. A., Register, R. A., Vega, D. A. & Gómez, L. R. Crystallization Dynamics on  
486 Curved Surfaces. *Phys. Rev. E* **88**, 12306 (2013).
- 487 21. García, N. A., Pezzutti, A. D., Register, R. A., Vega, D. A. & Gómez, L. R. Defect  
488 formation and coarsening in hexagonal 2D curved crystals. *Soft Matter* **11**, 898–907  
489 (2015).

- 490 22. Yoon, J. *et al.* Revealing the Nanoscale Morphology of the Primary Cilium using Super-  
491 resolution Fluorescence Microscopy. *Biophys. J.* **116**, 1–11 (2019).
- 492 23. Awram, P. & Smit, J. The *Caulobacter crescentus* Paracrystalline S-layer Protein is  
493 Secreted by an ABC Transporter (Type I) Secretion Apparatus. *J. Bacteriol.* **180**, 3062–9  
494 (1998).
- 495 24. Sotomayor-Pérez, A.-C., Ladant, D. & Chenal, A. Disorder-to-Order Transition in the  
496 CyaA Toxin RTX Domain: Implications for Toxin Secretion. *Toxins (Basel)*. **7**, 1–20  
497 (2014).
- 498 25. Smit, J. & Agabian, N. Cell Surface Patterning and Morphogenesis: Biogenesis of a  
499 Periodic Surface Array During *Caulobacter* Development. *J. Cell Biol.* **95**, 41–49 (1982).
- 500 26. Toporowski, M. C., Nomellini, J. F., Awram, P. & Smit, J. Two Outer Membrane Proteins  
501 Are Required for Maximal Type I Secretion of the *Caulobacter crescentus* S-Layer  
502 Protein. *J. Bacteriol.* **186**, 8000–8009 (2004).
- 503 27. Gitai, Z., Dye, N. A., Reisenauer, A., Wachi, M. & Shapiro, L. MreB Actin-mediated  
504 Segregation of a Specific Region of a Bacterial Chromosome. *Cell* **120**, 329–341 (2005).
- 505 28. Chen, Y. E. *et al.* Spatial Gradient of Protein Phosphorylation Underlies Replicative  
506 Asymmetry in a Bacterium. *Proc. Natl. Acad. Sci.* **108**, 1052–1057 (2011).
- 507 29. Walker, S. G., Karunaratne, D. N., Ravenscroft, N. & Smit, J. Characterization of Mutants  
508 of *Caulobacter crescentus* Defective in Surface Attachment of the Paracrystalline Surface  
509 Layer. *J. Bacteriol.* **176**, 6312–6323 (1994).
- 510 30. Herrmann, J. *et al.* Environmental Calcium Controls Alternate Physical States of the  
511 *Caulobacter* Surface Layer. *Biophys. J.* **112**, 1841–1851 (2017).
- 512 31. Stel, B., Cometto, F., Rad, B., De Yoreo, J. J. & Lingenfelder, M. Dynamically resolved

- 513 self-assembly of S-layer proteins on solid surfaces. *Chem. Commun.* **54**, 10264–10267  
514 (2018).
- 515 32. Lasker, K. *et al.* Phospho-signal flow from a pole-localized microdomain spatially  
516 patterns transcription factor activity. *bioRxiv* 220293 (2018). doi:10.1101/220293
- 517 33. Ghosh, A. S. & Young, K. D. Helical Disposition of Proteins and Lipopolysaccharide in  
518 the Outer Membrane of *Escherichia coli*. *J. Bacteriol.* **187**, 1913–1922 (2005).
- 519 34. Garcia-Seisdedos, H., Empereur-Mot, C., Elad, N. & Levy, E. D. Proteins Evolve on the  
520 Edge of Supramolecular Self-assembly. *Nature* **548**, 244–247 (2017).
- 521 35. Suzuki, Y. *et al.* Self-assembly of Coherently Dynamic, Auxetic, Two-dimensional  
522 Protein Crystals. *Nature* **533**, 369–373 (2016).
- 523 36. Li, P.-N. *et al.* Nutrient Transport Suggests an Evolutionary Basis for Charged Archaeal  
524 Surface Layer Proteins. *ISME J.* **12**, 2389–2402 (2018).
- 525 37. Kirk, J. A., Banerji, O. & Fagan, R. P. Characteristics of the *Clostridium difficile* Cell  
526 Envelope and its Importance in Therapeutics. *Microb. Biotechnol.* **10**, 76–90 (2017).
- 527 38. Garduno, R. A. *et al.* Host Cell Invasion and Intracellular Residence by *Aeromonas*  
528 *salmonicida*: Role of the S-layer. *Can. J. Microbiol.* **46**, 660–668 (2000).
- 529 39. Kern, J. & Schneewind, O. BslA, the S-layer Adhesin of *Bacillus anthracis*, is a Virulence  
530 Factor for Anthrax Pathogenesis. *Mol. Microbiol.* **75**, 324–332 (2010).
- 531 40. Sleytr, U. B. *et al.* in *Progress in Molecular Biology and Translational Science* **103**, 277–  
532 352 (2011).
- 533 41. Bingle, W. H., Nomellini, J. F. & Smit, J. Cell-surface Display of a *Pseudomonas*  
534 *aeruginosa* Strain K Pilin Peptide within the Paracrystalline S-layer of *Caulobacter*  
535 *crescentus*. *Mol. Microbiol.* **26**, 277–288 (1997).

- 536 42. Charrier, M. *et al.* Engineering the S-layer of *Caulobacter crescentus* as a Foundation for  
537 Stable, High-Density, 2D Living Materials. *ACS Synth. Biol.* acssynbio.8b00448 (2018).  
538 doi:10.1021/acssynbio.8b00448
- 539 43. Zhou, X., Hu, X., Li, J. & Wang, N. A Novel Periplasmic Protein, VrpA, Contributes to  
540 Efficient Protein Secretion by the Type III Secretion System in *Xanthomonas* spp. *Mol.*  
541 *Plant-Microbe Interact.* **28**, 143–153 (2015).
- 542 44. Walker, S. G., Smith, S. H. & Smit, J. Isolation and Comparison of the Paracrystalline  
543 Surface Layer Proteins of Freshwater *Caulobacters*. *J. Bacteriol.* **174**, 1783–1792 (1992).
- 544 45. von Diezmann, A., Shechtman, Y. & Moerner, W. E. Three-Dimensional Localization of  
545 Single Molecules for Super-Resolution Imaging and Single-Particle Tracking. *Chem. Rev.*  
546 **117**, 7244–7275 (2017).
- 547 46. Lew, M. D., von Diezmann, A. R. S. & Moerner, W. E. Easy-DHPSF Open-source  
548 Software for Three-dimensional Localization of Single Molecules with Precision Beyond  
549 the Optical Diffraction Limit. *Protoc. Exch.* (2013). doi:doi:10.1038/protex.2013.026
- 550 47. Cignoni, P. *et al.* MeshLab: An Open-source Mesh Processing Tool. *Eurographics Ital.*  
551 *Chapter Conf.* 129–136 (2008).  
552 doi:10.2312/LocalChapterEvents/ItalChap/ItalianChapConf2008/129-136

553

#### 554 Data Availability Statement

555 Extended data figures (10) are provided with this manuscript, which include representative  
556 images from all data sets. Full imaging data sets are available from the corresponding author  
557 W.E.M. upon reasonable request.

558

559 Acknowledgements

560 This work was supported in part by the National Institute of General Medical Sciences: Grants  
561 No. R01-GM086196 to W.E.M. and L.S., R35-GM118067 to W.E.M., and R35-GM118071 to  
562 L.S., and in part by the US Department of Energy, Laboratory Directed Research and  
563 Development under contract No. DE-AC02-76SF00515 and Biology and Environmental  
564 Research to S.W. L.S. is a Chan Zuckerberg Biohub Investigator. J.S. was supported by the  
565 Natural Sciences and Engineering Research Council of Canada Discovery Program (Grant No.  
566 RGPIN 36574-11). C.J.C., J.H., and J.Y. were supported in part by the National Science  
567 Foundation Graduate Research Fellowship Program (NSF-GRFP). J.H. was supported in part by  
568 the US Department of Energy Office of Science Graduate Student Research Program (DOE-  
569 SCGSR). The authors thank Greg Stewart/SLAC for graphic design support.

570

571 Author Contributions

572 Conceptualization: C.J.C., J.H., L.S., S.W., and W.E.M. Investigation: C.F.C., J.H., J.Y., and F.J.  
573 Formal analysis: C.J.C., J.H., J.Y., X.Z., and W.E.M. Resources: X.Z., J.N., J.S., and L.S.  
574 Writing—original draft: C.J.C. and J.H. Writing—review and editing: All authors. Supervision  
575 and funding acquisition: J.S., L.S., S.W., and W.E.M.

576

577 Competing Interests

578 The authors declare no competing financial interests.

579

580 Correspondence and requests for materials should be addressed to S.W. or W.E.M.
